# Supplementary material
Source: PubMed Central journal article supplement (PMC3380284)
Supplement: supp_46.6.723_Comhair_ODS.pdf [file supp_46.6.723_Comhair_ODS.pdf]

## **Human Primary Lung Endothelial Cells in Culture**

Suzy A.A Comhair, Weiling Xu, Lori Mavrakis, Micheala A. Aldred, Kewal  
Asosingh and Serpil C. Erzurum

ONLINE DATA SUPPLEMENT

## **Real Time Movie of In Vitro Tube Formation**

In vitro tube formation was assessed using a Matrigel endothelial cell tube formation assay (Chemicon International, Temecula, CA) (Yahata, Shirakata et al. 2003). Matrigel, a solid gel of basement membrane proteins, prepared from Engelbreth-Holm-Swarm mouse tumor was added to 6 well plate and allowed to gel for >1 h at 37C. PAEC were seeded on the surface plates at  $18 \times 10^4$  cells/well. Angiogenesis was observed by phase contrast microscopy and documented by collecting digital images over time (0 to 8 h).

The time course of angiogenesis was evaluated by collecting and quantitating time-lapse movies of cells, using a live-cell imaging system and Metamorph software (Universal Imaging, Downingtown, PA).
